# Supplementary material
Source: publisher figshare collection journal article supplement (https://frontiersin.figshare.com/ndownloader/files/33526694)
Supplement: Supplementary file 1 [file 33526694]

Supplementary Material

# Supplementary Figures and Tables

## Supplementary Figures


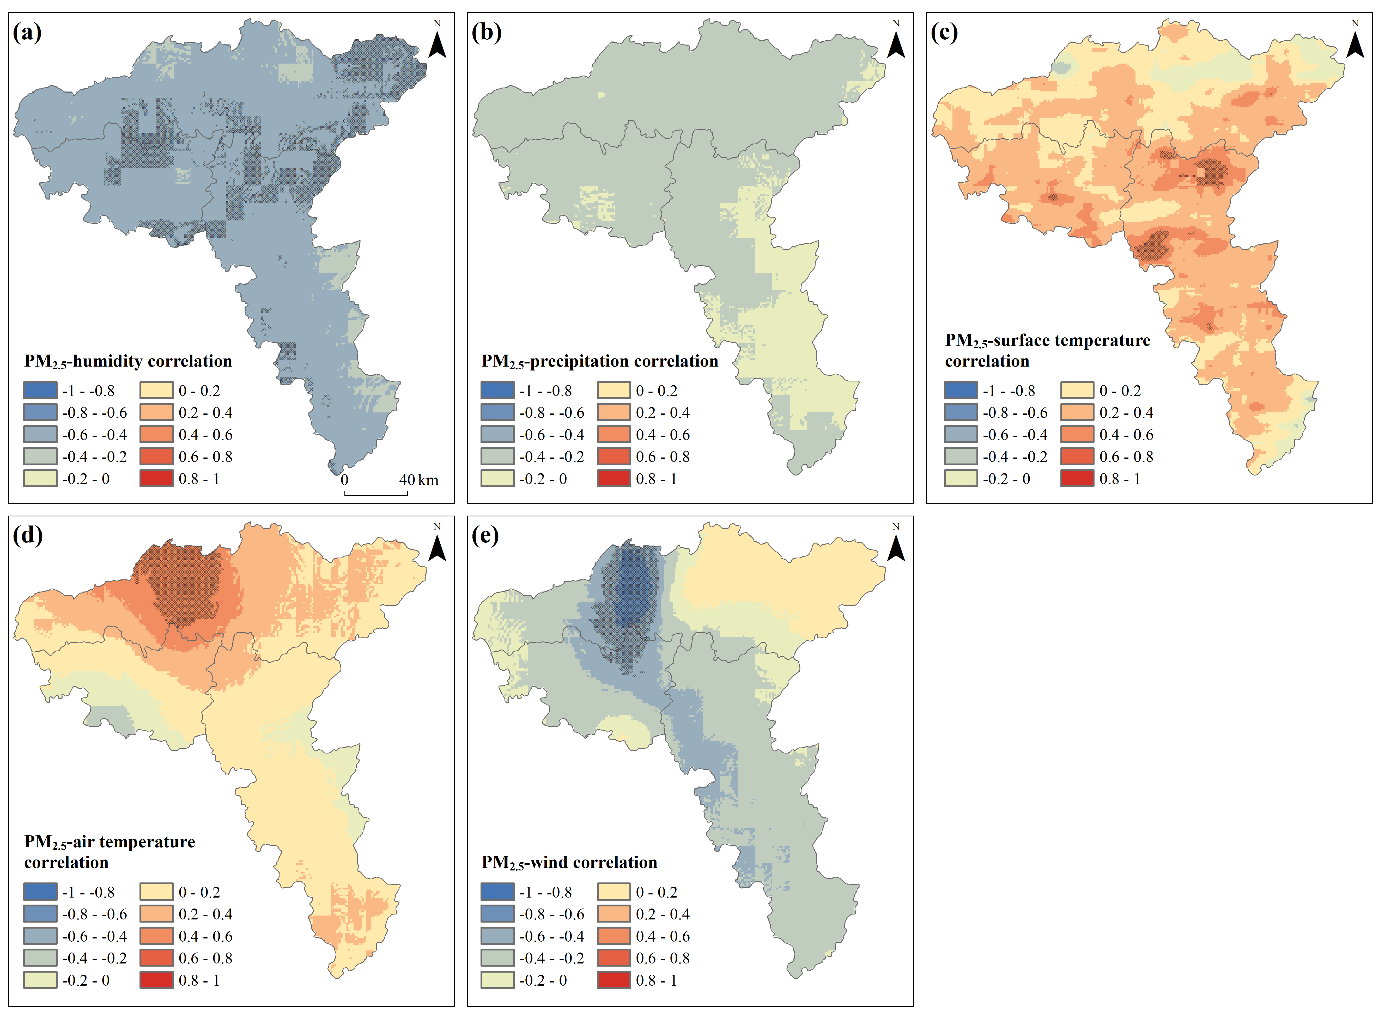


**Supplementary Figure 1.** Correlations between PM2.5 concentrations and various meteorological factors: (a) relative humidity, (b) precipitation, (c) land surface temperature, (d) air temperature and (e) windspeed. Correlations significant at *p*<0.05 are marked with ‘×’.


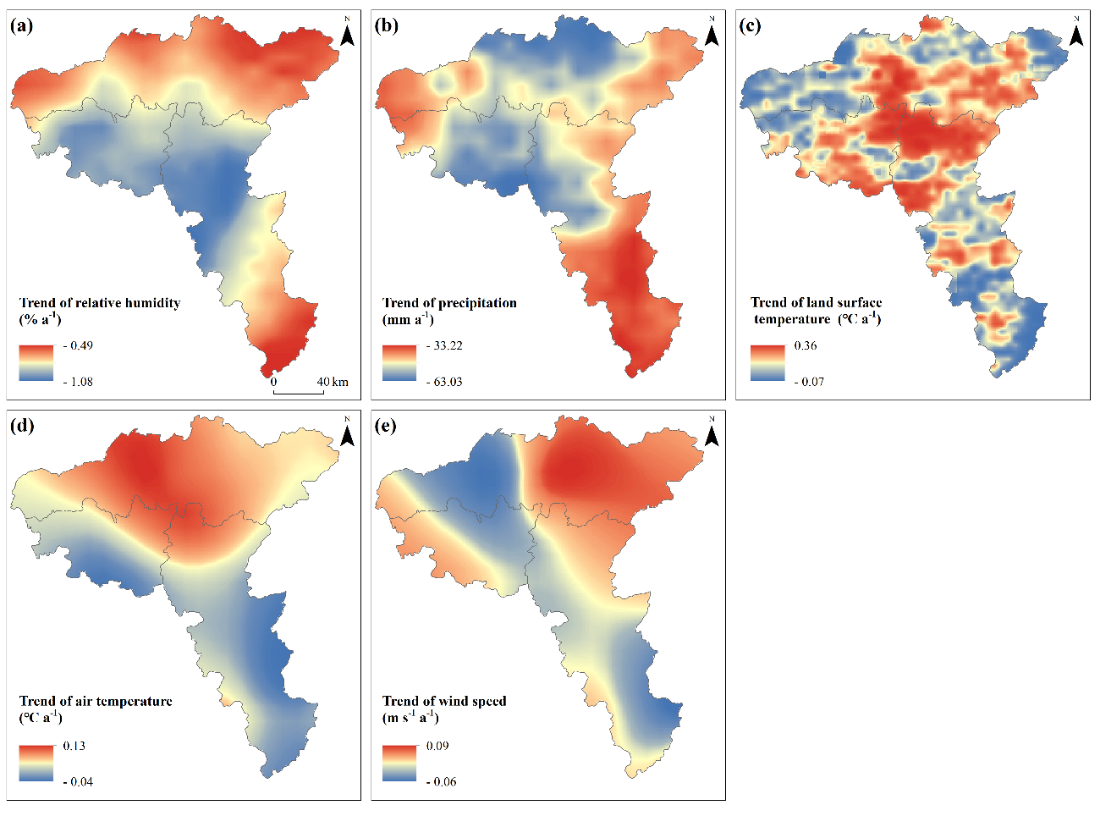


**Supplementary Figure 2.** Spatial pattern of the trends in (a) relative humidity, (b) precipitation, (c) land surface temperature, (d) air temperature and (d) wind speed from 2001 to 2008 in the CZT.


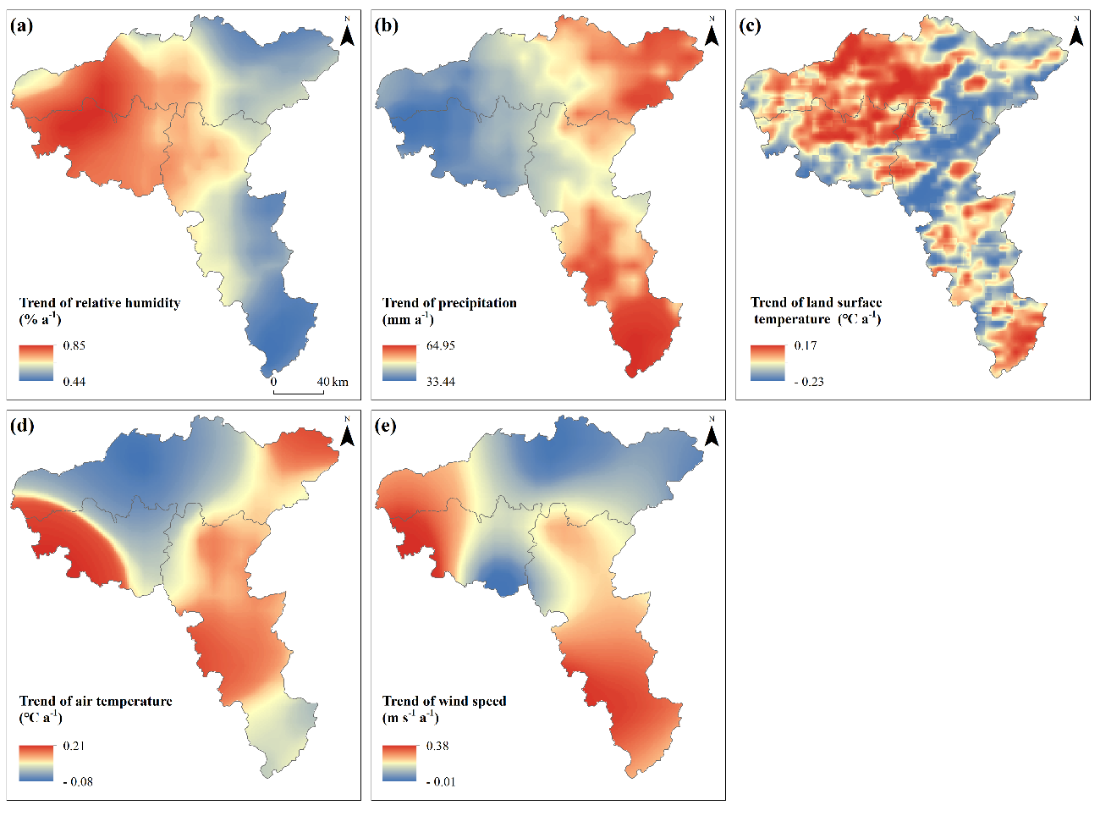


**Supplementary Figure 3.** Spatial pattern of the trends in (a) relative humidity, (b) precipitation, (c) land surface temperature, (d) air temperature and (d) wind speed from 2008 to 2014 in the CZT.


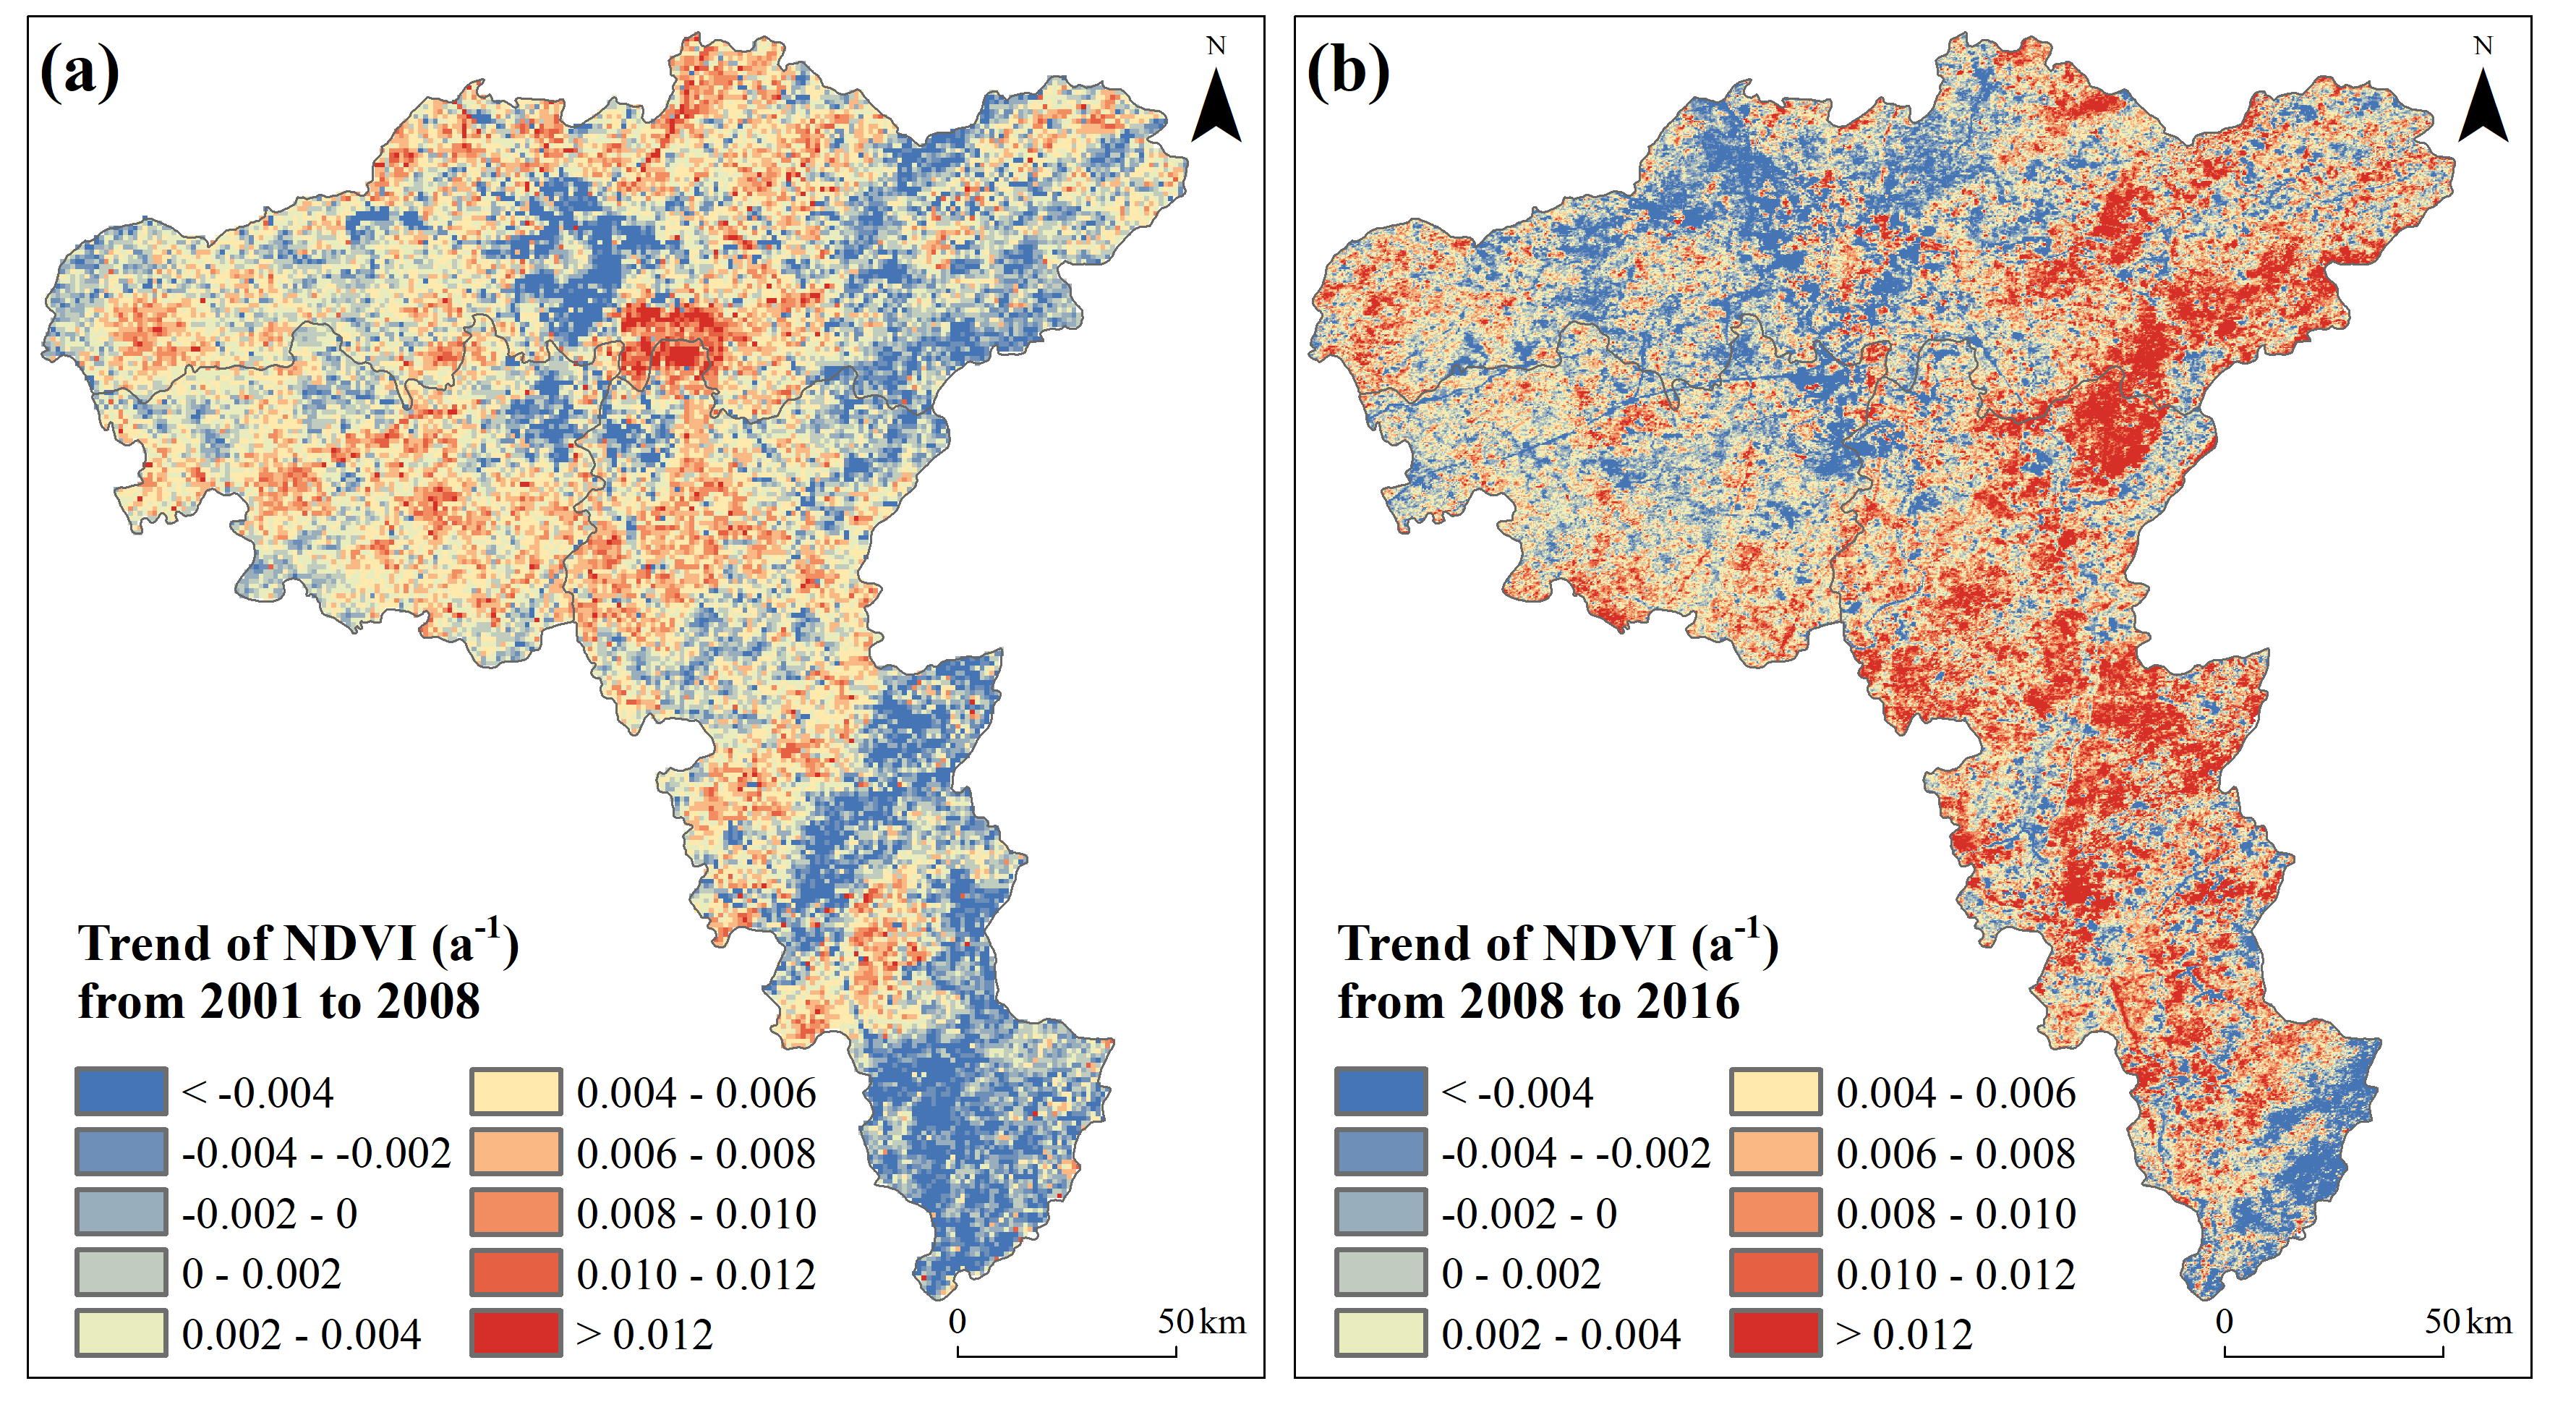


**Supplementary Figure 4.** Spatial pattern of the trends in NDVI during (a) 2001-2008 and (b) 2008-2014. NDVI data was calculated from MODIS surface spectral reflectance dataset MOD09GA at a resolution of 500m (https://lpdaac.usgs.gov/products/mod09gav006/).
